1 **Short title: Insecticide susceptibility of *Aedes* spp. in Kinshasa**

2

3 **Insecticide susceptibility of *Aedes (Stegomyia) aegypti* (Linnaeus, 1762) and *Aedes (Stegomyia)***

4 ***albopictus* (Skuse, 1894) in Kinshasa, Democratic Republic of the Congo**

5

6 **Fabien Vulu<sup>1,2\*</sup>, Gillon Ilombe<sup>3,4</sup>, Lucrecia Vizcaino<sup>5</sup>, Joachim Mariën<sup>6</sup>, Yasue Morimoto<sup>2</sup>, David**

7 **Weetman<sup>7</sup>, Audrey Lenhart<sup>5</sup>, Seth R. Irish<sup>5,8</sup>, Thierry L. Bobanga<sup>1</sup>**

8

9 <sup>1</sup> Services de Parasitologie et d'Entomologie, Département de Médecine Tropicale, Faculté de

10 Médecine, Université de Kinshasa, Democratic Republic of the Congo; <sup>2</sup> Graduate School of

11 Biomedical Sciences, Nagasaki University, Nagasaki, Japan; <sup>3</sup> Department of Entomology, Institut

12 National de Recherche Biomédicale, Kinshasa, Democratic Republic of the Congo; <sup>4</sup> Antwerp

13 University, Global Health Institute, Antwerp, Belgium; <sup>5</sup> Entomology Branch, Division of Parasitic

14 Diseases and Malaria, Center for Global Health, Centers for Disease Control and Prevention, Atlanta,

15 Georgia, U.S.A; <sup>6</sup> Evolutionary Ecology group, University of Antwerp, Antwerp, Belgium; <sup>7</sup>

16 Department of Vector Biology, Liverpool School of Tropical Medicine, Pembroke Place, Liverpool,

17 United Kingdom; <sup>8</sup> President's Malaria Initiative, Centers for Disease Control and Prevention,

18 Atlanta, Georgia, USA.

19

20 Corresponding author: [\\*cedricvulu2014@gmail.com](mailto:*cedricvulu2014@gmail.com) (Fabien Vulu)

21 **Abstract**

22 *Aedes aegypti* and *Aedes albopictus* are arbovirus vectors of public health concern. Although the  
23 Democratic Republic of the Congo (DRC) faces a long-standing risk of *Aedes*-borne viruses, data on  
24 insecticide resistance of *Aedes* populations are absent. To address this gap, we investigated insecticide  
25 susceptibility of *Ae. aegypti* and *Ae. albopictus* in areas with a high risk of arbovirus transmission. We  
26 also investigated the frequency of knock-down resistance (*kdr*) mutations in *Ae. aegypti*. Immature  
27 stages of *Ae. aegypti* and *Ae. albopictus* were collected from two sites in Kinshasa (Lingwala and Cité  
28 Verte) between April and July 2017 and reared to the adult stage. Wild-caught adult *Ae. aegypti* were  
29 collected in 2016 in another site (Ngaliema). Female *Ae. aegypti* (from Lingwala) and *Ae. albopictus*  
30 (from Cité Verte) were used in WHO tube insecticide susceptibility tests. The F1534C, V1016I and  
31 V410L *kdr* mutations were genotyped in *Ae. aegypti* from Lingwala and Ngaliema. We observed *Ae.*  
32 *aegypti* to be susceptible to bendiocarb, propoxur and malathion, suspected resistant to permethrin,  
33 and resistant to deltamethrin and DDT. *Aedes albopictus* was susceptible to bendiocarb, propoxur,  
34 malathion and permethrin, suspected resistant to deltamethrin and resistant to DDT. While F1534C  
35 and V1016I were not detected, a few *Ae. aegypti* from Lingwala were heterozygous for the mutation  
36 V410L. This study reports for the first time the insecticide resistance status of *Aedes spp.* and the  
37 detection of the *kdr* mutation V410L in *Ae. aegypti* in DRC. Given the resistance profile, carbamates  
38 and potentially malathion are recommended insecticide options against *Ae. aegypti* in Kinshasa. It will  
39 be important to develop *Aedes* control strategies based on the resistance patterns of *Aedes* in Kinshasa.

40 **Key words:** *Aedes* mosquitoes, pyrethroids, resistance, *kdr* mutations

41

## 42 **Introduction**

43 *Aedes aegypti* and *Aedes albopictus* are important arbovirus vectors with an increasing distribution  
44 range [1]. Whereas *Ae. aegypti* originated in sub-Saharan Africa, *Ae. albopictus* originated in  
45 southeast Asia and was first observed in Africa in 1989 (South-Africa) [2, 3, 4]. Currently, *Ae. aegypti*  
46 is distributed primarily in tropical and subtropical regions of the world while *Ae. albopictus* is found  
47 on all continents except Antarctica [1, 5]. Both *Ae. aegypti* and *Ae. albopictus* can transmit viruses that  
48 are pathogenic to humans including dengue, chikungunya, Zika and yellow fever viruses [5].

49

50 The public health threat posed by *Aedes*-borne viruses is increasing due to the rapid spread of their  
51 mosquito vectors in new regions [1, 5, 6]. Dengue fever (DF) was first reported in the Americas in the  
52 seventeenth century following the introduction of *Ae. aegypti* [7]. Currently, dengue virus (DENV,  
53 *Flaviviridae, Flavivirus*) is the most important arbovirus worldwide: endemic in more than 125  
54 countries, dengue affects an estimated 390 million people annually [8]. Chikungunya (CHIKV,  
55 *Togaviridae, Alphavirus*) and Zika (ZIKV, *Flaviviridae, Flavivirus*) viruses both emerged in East  
56 Africa in the middle of the twentieth century and then spread worldwide [9, 10]. Although both  
57 diseases are seldom deadly, they can cause a high disease burden in the affected communities [9 - 11].  
58 Yellow fever (YF) originated in Africa and emerged in the Americas in the seventeenth century.  
59 Despite the existence of an effective vaccine, YF remains a public health concern in Africa and South  
60 America. It was estimated that 97,400 YF cases (28,000-251,700) and 4,800 (1,000-13,800) associated  
61 deaths occurred worldwide in 2017 [12]. The 2015-2016 YF outbreak in Angola and the Democratic  
62 Republic of the Congo (DRC) highlighted once again how threatening this disease can be [13].

63

64 In the absence of effective vaccines or specific drugs against most *Aedes*-borne viruses, vector control  
65 remains indispensable to control and prevent disease outbreaks [14]. Vector control is often based on  
66 source reduction (e.g. removing water containers that serve as larval habitats) and the use of  
67 insecticides against adult and immature mosquitoes. The insecticides generally used belong to four  
68 main families: organochlorines, organophosphates, carbamates and pyrethroids [15]. Pyrethroids are  
69 most commonly used against adult *Aedes* because of their broad arthropod toxicity but low toxicity to

70 mammals [15, 16]. Since *Aedes* are increasingly reported as resistant to pyrethroids and other  
71 insecticides in many parts of the world, it is essential to monitor the susceptibility of *Aedes* to these  
72 insecticides in areas threatened by *Aedes*-borne viruses [14, 17]. Moreover, the determination of the  
73 underlying resistance mechanisms is of interest since it can guide the choice of new insecticides by  
74 providing a deeper understanding of cross resistance and selection pressures on populations.  
75 Insensitivity of insecticide target sites due to mutations and increased insecticide detoxification are the  
76 main mechanisms associated with resistance in *Aedes* [17]. Mutations in the voltage gated sodium  
77 channel gene causing knock-down resistance (*kdr*) are important target site mutations associated with  
78 pyrethroid resistance and are common in *Ae. aegypti* [17]. More than 10 mutations have been recorded  
79 globally, of which the F1534C, V1016I, and V410L mutations have been reported so far in *Ae. aegypti*  
80 in Africa [17- 21].

81  
82 Much of DRC is at high risk of *Aedes*-borne virus transmission [5, 22-25], with YF and chikungunya  
83 outbreaks occurring regularly [24 - 28]. Although DF outbreaks have not been reported,  
84 seroprevalence studies indicate that DENV strains are circulating in the human population [29 - 31].  
85 Both *Ae. aegypti* and *Ae. albopictus* are present in DRC and large areas of the country are suitable for  
86 their establishment [5, 32]. In addition, a previous study reported that CHIKV was detected in *Aedes*  
87 populations around Kinshasa [33]. Also, *Ae. aegypti* and *Ae. albopictus* were vectors of the 2019  
88 chikungunya outbreak in DRC's capital Kinshasa and the major port city of Matadi, respectively [24].  
89 Despite the long-standing risk of *Aedes*-borne diseases, insecticide resistance status of *Aedes*  
90 populations have not previously been reported from DRC [17]. To address this gap, we investigated  
91 the susceptibility of *Ae. aegypti* and *Ae. albopictus* in high risk areas of arbovirus transmission to the  
92 following insecticides: dichlorodiphenyltrichloroethane (DDT), deltamethrin, permethrin, bendiocarb,  
93 propoxur and malathion. We also investigated the frequency of three *kdr* mutations (F1543C, V1016I,  
94 V410L) in *Ae. aegypti*.

95

## 96 **Materials and methods**

### 97 **Study sites**

98 Immature stages of *Ae. aegypti* and *Ae. albopictus* were collected from two sites in Kinshasa (DRC)  
99 between April and July 2017, Lingwala (S 04° 19'33'', E 015°18'20'') and Cité Verte (S 04°25'52'', E  
100 015°15'35'') (Fig. 1). An additional sample of dead adult *Ae. aegypti* collected in February 2016 in  
101 Ngaliema (S 04° 21'7''/E 015° 14'33'') during a previous study was also used for *kdr* genotyping only  
102 (Fig. 1) [32]. All these sites have experienced arbovirus outbreaks in the past. Autochthonous cases of  
103 YF were reported during the 2016 outbreak in Lingwala and in Selembao, in which the Cité Verte site  
104 is located. Probable chikungunya cases were observed in Cité Verte and Ngaliema during the poorly  
105 documented chikungunya outbreak in 2012 [27, 30, 31, 34]. Furthermore, antibodies against CHIKV  
106 and DENV were reported in approximately 30% of febrile patients from Selembao and Ngaliema,  
107 tested in 2005-2006 [29].

108

### 109 **Fig 1. *Aedes* sampling sites in Kinshasa, DRC.**

110

### 111 **Mosquito collections, rearing and identification**

112 Tires filled with rain water were used as oviposition traps in sites in Lingwala (n=6) and Cité Verte  
113 (n=10). The tires were checked every five days throughout the study duration for the presence of  
114 mosquito larvae, which were collected using a pipette or ladle and brought to the insectary at the  
115 Tropical Medicine Department of Kinshasa University. Larvae were fed with fish food and reared to  
116 the adult stage under ambient conditions, with temperature and humidity within the target ranges of  
117 28±2 °C and 80±5%, respectively, throughout the study duration. Adult mosquitoes obtained from  
118 immature stages were identified to species using morphological keys according to Huang [35] and  
119 kept alive. In the earlier sampling in Ngaliema, adult mosquitoes were collected using electric  
120 Prokopack aspirators (John W. Hock, Gainesville, USA) from 3:30 to 6:30 pm [32]. The dead  
121 mosquitoes were later identified to species as above.

122

## 123 **Adult bioassays**

124 To assess the insecticide susceptibility of *Ae. aegypti* and *Ae. albopictus*, we used World Health  
125 Organisation (WHO) insecticide susceptibility tube tests performed on (non-blood-fed) F<sub>0</sub> adult female  
126 *Ae. aegypti* (from Lingwala) and *Ae. albopictus* (from Cité Verte) [36]. For each test, 3-4 replicates of  
127 20-25 females fed *ad libitum* on a 10% sugar solution were exposed for one hour to insecticide-  
128 impregnated papers treated with deltamethrin 0.05% (pyrethroid), permethrin 0.75% (pyrethroid),  
129 bendiocarb 0.1% (carbamate), propoxur 0.1% (carbamate), malathion 5% (organophosphate), or DDT  
130 4% (organochlorine). Although these insecticide concentrations were initially recommended for  
131 *Anopheles*, they are commonly used to screen *Aedes* for insecticide resistance in Africa, though it  
132 should be noted that the doses for permethrin and malathion are three and approximately six-times  
133 higher, respectively, than the recommended *Aedes* doses [17]. Insecticide-impregnated papers were  
134 obtained from the Vector Control Research Unit at the Universiti Sains Malaysia, Penang, Malaysia.  
135 Controls were also run by exposing 2 replicates of 20-25 adult female mosquitoes to untreated papers.  
136 After 60 minutes of insecticide exposure, mosquitoes were transferred into holding tubes and supplied  
137 with a 10% sugar solution. Percent mortality was recorded 24 hours after exposure, and the 95%  
138 binomial confidence intervals were calculated using SPSS 21.0 (IBM Corp. Armonk, NY, USA).  
139 Mortalities were corrected when necessary using Abbott's formula (if control mortality was between 5  
140 and 20%) [36]. We used the following WHO criteria to score population-level  
141 resistance/susceptibility: Mortality rates <90% were considered resistant, > 97% were considered  
142 susceptible and mortality rates between 90 and 97% were suspected resistant [36]. *Ae. aegypti*  
143 specimens that survived after pyrethroid exposures were killed by freezing, stored at 0°C and later sent  
144 (with *Ae. aegypti* from Ngaliema) to the Centers for Disease Control and Prevention (CDC, USA) for  
145 *kdr* genotyping.

146

## 147 **DNA extraction and *kdr* mutation detection**

148 Real-time PCR was used to identify the F1534C, V1016I, and V410L *kdr* mutations. To estimate the  
149 allele frequencies, 28 *Ae. aegypti* female survivors to pyrethroid exposures from Lingwala and 47 wild  
150 caught female *Ae. aegypti* from Ngaliema were analyzed. DNA was extracted from individual

151 mosquitoes using the Quanta Biosciences Extracta™ Kit. Each mosquito was placed in a sterile 0.2  
152 mL tubes with 25 µL extraction buffer, followed by an incubation at 95°C for 30 min in a C1000 Bio-  
153 Rad CFX 96 Touch™ Real-Time System thermocycler. At the end of the incubation, 25 µL of  
154 stabilization buffer was added. DNA was quantified using a NanoDrop™ 2000/2000c  
155 spectrophotometer (ThermoFisher Scientific). PCR reactions were performed in a Bio-Rad C1000  
156 CFX96 Real-Time System thermocycler. Genotypes were determined by analyzing the melting curves  
157 of the PCR products.

158  
159 The F1534C mutation was detected following the methodology described by Yanola et al. [37] using a  
160 final reaction volume of 20 µL comprised of 7.15 µL of ddH<sub>2</sub>O, 9 µL of iQ™ SYBR1Green  
161 Supermix (Bio-Rad), 0.6 µL of each of the F1534-f forward primer, [5'-GCG GGC TCT ACT TTG  
162 TGT TCT TCA TCA TAT T-3'] and CP-r common reverse primer, [5'-TCT GCT CGT TGA AGT  
163 TGT CGA T-3']; 0.65 µL of the C1534-f forward primer, [5'-GCG GGC AGG GCG GCG GGG GCG  
164 GGG CCT CTA CTT TGT GTT CTT CAT CAT GTG-3'] primer, and 2 µL of DNA template. The  
165 cycling conditions were as follows: an initial denaturation at 95°C for 3 min followed by 37 cycles of:  
166 95°C for 10 s, 57°C for 10 s, and 72°C for 30 s; and a final extension at 95°C for 10 s. The melting  
167 curves were determined by a denaturation gradient from 65°C to 95°C with an increase of 0.2°C every  
168 10 s.

169  
170 The V1016I mutation was amplified following the methodology described by Saavedra-Rodriguez *et*  
171 *al.* [38], using a final reaction volume of 20 µL, containing 8.866 µL of ddH<sub>2</sub>O, 8 µL of iQ™  
172 SYBR1 Green Supermix (Bio-Rad), 0.4 µL of each of the Iso1016f forward primer, [5'-GCG GGC  
173 ACA AAT TGT TTC CCA CCC GCA CTG A-3']; and Iso1011r reverse primer ; [5'-GGA TGA  
174 ACC SAA ATT GGA CAA AAG C-3']; 0.34 µL of Val1016f forward primer [5'-GCG GGC AGG  
175 GCG GCG GGG GCG GGG CCA CAA ATT GTT TCC CAC CCG CAC CGG-3'] and 1 µL of DNA  
176 template. The cycling conditions were as follows: an initial denaturation at 95°C for 3 min followed by  
177 35 cycles of: 95°C for 10 s, 60°C for 10 s, and 72°C for 30 s; and a final extension at 95°C for 10 s.

178 The melting curves were determined by a denaturation gradient from 65°C to 95°C with an increase of  
179 0.2°C every 10 s.

180

181 The V410L mutation was detected following the methodology described by Saavedra *et al.* [39] using  
182 a final reaction volume of 20 µL comprised of 8.7 µL of ddH<sub>2</sub>O, 9.9 µL of iQTM SYBR1Green  
183 Supermix (Bio-Rad), 0.1 µL of each L410fw, [5'-GCG GGC ATC TTC TTG GGT TCG TTC TAC  
184 CAT T-3'] and V410fw, [5'-GCG GGC AGG GCG GCG GGG GCG GGG CCA TCT TCT TGG  
185 GTT CGT TCT ACC GTG-3'] primers; 0.2 µL of a common reverse primer 410rev [5'-TTC TTC  
186 CTC GGC GGC CTC TT-3'] and 2 µL of DNA template. The cycling conditions were as follows: an  
187 initial denaturation at 95°C for 3 min followed by 40 cycles of: 95°C for 10 s, 60°C for 10 s, and 72°C  
188 for 30 s; and a final extension at 95°C for 10 s. The melting curves were determined by a denaturation  
189 gradient from 65°C to 95°C with an increase of 0.2°C every 10 s.

190

## 191 **Results**

### 192 **Relative abundance of *Aedes* species by collection site**

193 A total of 4,802 *Aedes* were obtained from immature stages collected throughout the study belonging  
194 to two species: *Ae. aegypti* (2,558 specimens) and *Ae. albopictus* (2,244 specimens). A total of 2,544  
195 (1,576 females) *Ae. aegypti* and 171 (93 females) *Ae. albopictus* were obtained from Lingwala and 14  
196 (4 females) *Ae. aegypti* and 2,073 (1,320 females) *Ae. albopictus* were obtained from Cité Verte. In  
197 total 1,851 female *Aedes* were used in bioassays (including controls and 2 tests discarded because of  
198 high mortality in the control), out of which 1,097 were female *Ae. aegypti* from Lingwala and 754  
199 were female *Ae. albopictus* from Cité Verte.

200

### 201 **Adult bioassays**

202 *Aedes aegypti* were fully susceptible to bendiocarb and malathion (100% mortality) and also  
203 susceptible to propoxur (98% mortality). Suspected resistance was detected to permethrin (97%  
204 mortality), and resistance was detected to deltamethrin and to DDT with mortality rates of 73% and



205 25%, respectively (Table 1). *Aedes albopictus* was fully susceptible to permethrin, bendiocarb,  
 206 propoxur and malathion (100% mortality). Suspected resistance to deltamethrin (92% mortality) and  
 207 resistance to DDT (36% mortality) were detected (Table 1).

208

209 **Table 1: Mortality rates of adult female *Ae. aegypti* (Lingwala) and *Ae. albopictus* (Cit e Verte) 24**  
 210 **hours after exposure to insecticides in WHO bioassays.**

| Insecticide class | Insecticide type   | <i>Aedes</i> species  | Number tested<br>(mosquito dead) | % Mortality<br>(95% CI) | Status <sup>a</sup> |
|-------------------|--------------------|-----------------------|----------------------------------|-------------------------|---------------------|
| Organochlorine    | DDT 4%             | <i>Ae. aegypti</i>    | 63 (16)                          | 25 (16 - 37)            | <b>R</b>            |
|                   |                    | <i>Ae. albopictus</i> | 84 (30)                          | 36 (26 - 46)            | <b>R</b>            |
| Pyrethroid        | Deltamethrin 0.05% | <i>Ae. aegypti</i>    | 94 (69)                          | 73 (64 - 82)            | <b>R</b>            |
|                   |                    | <i>Ae. albopictus</i> | 80 (74)                          | 92 (86-98)              | <b>SR</b>           |
|                   | Permethrin 0.75%   | <i>Ae. aegypti</i>    | 97 (94)                          | 97 (93 - 100)           | <b>SR</b>           |
|                   |                    | <i>Ae. albopictus</i> | 80 (80)                          | 100 (95-100)            | <b>S</b>            |
| Carbamate         | Bendiocarb 0.1%    | <i>Ae. aegypti</i>    | 93 (93)                          | 100 (96-100)            | <b>S</b>            |
|                   |                    | <i>Ae. albopictus</i> | 80 (80)                          | 100 (95-100)            | <b>S</b>            |
|                   | Propoxur 0.1%      | <i>Ae. aegypti</i>    | 98 (96)                          | 98 (95 - 100)           | <b>S</b>            |
|                   |                    | <i>Ae. albopictus</i> | 80 (80)                          | 100 (95-100)            | <b>S</b>            |
| Organophosphate   | Malathion 5%       | <i>Ae. aegypti</i>    | 94 (94)                          | 100 (96-100)            | <b>S</b>            |
|                   |                    | <i>Ae. albopictus</i> | 100 (100)                        | 100 (96-100)            | <b>S</b>            |

<sup>a</sup> R: Resistant; S: Susceptible; SR: Suspected Resistant.

211

212 ***kdr* mutations**

213 A total of 75 female *Ae. aegypti* (28 from Lingwala and 47 from Ngaliema) were genotyped for the

214 *kdr* mutations F1534C and V1016I. All mosquitoes tested were wild type at these loci. Concerning

215 mutation V410L, 54 female *Ae. aegypti* (24 from Lingwala and 30 from Ngaliema) were genotyped.  
216 Seven mosquitoes were heterozygous for the leucine mutation (all from Lingwala) with a resulting  
217 frequency of L410 at 14.5% (CI 95%: 8.7-20.3%) (Table 2).

218

219 **Table 2: Frequency of V410L *kdr* mutation in *Ae. aegypti*.**

| Site     | n  | 410 |    |    | L410 Allele frequency |          |
|----------|----|-----|----|----|-----------------------|----------|
|          |    | VV  | VL | LL | Frequency (%)         | 95% CI   |
| Lingwala | 24 | 17  | 7  | 0  | 14.5                  | 8.7–20.3 |
| Ngaliema | 30 | 30  | 0  | 0  | 0                     | –        |

220

## 221 Discussion

222 This study determined the susceptibility of *Ae. aegypti* and *Ae. albopictus* from Kinshasa to  
223 insecticides. Both *Ae. aegypti* and *Ae. albopictus* showed a high frequency of resistance to DDT and  
224 moderate resistance to pyrethroids, although were susceptible to carbamates and organophosphates.  
225 These results are consistent with other studies performed in Africa. Results from bioassays in  
226 neighbouring Republic of the Congo (RC) and Central African Republic (CAR) showed populations  
227 of *Ae. aegypti* and *Ae. albopictus* highly resistant to DDT [40, 41]. Highly-resistant populations to  
228 DDT were also recorded elsewhere in Africa including Cameroon and Burkina Faso [42, 43], as well  
229 as in Asia and in the Americas [17, 44 - 46]. Some authors have explained the high frequency of DDT  
230 resistance in *Aedes* populations as being due to the intense use of this insecticide in the past [40, 41].  
231 Indeed, the use of DDT in aerial spraying to control malaria vectors in Kinshasa several decades ago  
232 and the intense use in farming could have led to the emergence of resistance in mosquitoes including  
233 *Aedes spp.* [47]. Considering the pyrethroids, *Ae. aegypti* was resistant to deltamethrin and suspected  
234 resistant to permethrin, while *Ae. albopictus* was suspected resistant to deltamethrin and susceptible to  
235 permethrin. Fully susceptible populations of both species to deltamethrin have been recorded in RC,  
236 Cameroon, CAR and Nigeria; however, suspected or moderately resistant populations were also  
237 recorded by the same studies [40 - 42, 48]. Although, *Ae. aegypti* and *Ae. albopictus* populations have

238 generally shown low levels of resistance to deltamethrin in other parts of Africa, studies in Burkina  
239 Faso detected the presence of highly resistant *Ae. aegypti* populations [43, 49, 50]. Also, in Asia and in  
240 the Americas, studies have reported the presence of *Aedes* populations highly resistant to deltamethrin  
241 [17]. Regarding permethrin, studies in RC and Cameroon detected *Ae. aegypti* and *Ae. albopictus*  
242 resistant populations using the insecticide concentration that WHO typically recommends for *Aedes*  
243 [41, 42]. However, our study used a permethrin concentration three-fold higher [51]. As such, the  
244 permethrin resistance level could have been underestimated. Nevertheless, resistant *Ae. aegypti* and  
245 *Ae. albopictus* populations were also recorded in studies in Burkina Faso, Tanzania and Ghana using  
246 permethrin concentration similar to our study [52 - 54]. The reduced susceptibility to pyrethroids in  
247 both *Ae. aegypti* and *Ae. albopictus* observed in this study is of concern as pyrethroids are broadly  
248 recommended in control activities against adult *Aedes* [15, 16]. Moreover, the intense and continuous  
249 use of pyrethroids in mosquito nets, home insecticide sprays, and farming in Kinshasa might  
250 exacerbate the mosquito resistance [55].

251  
252 Both *Ae. aegypti* and *Ae. albopictus* were susceptible to bendiocarb, propoxur and malathion. These  
253 results are similar to other studies performed in neighbouring countries including RC, CAR and  
254 Tanzania in which some *Aedes* populations were susceptible to carbamates and organophosphates [40,  
255 41, 56]. In other parts of Africa (e.g. Burkina Faso), carbamate-resistant *Aedes* populations are more  
256 common [49, 50]. On the other hand, bioassays conducted with malathion across Africa have shown  
257 that both *Ae. aegypti* and *Ae. albopictus* populations were susceptible to this insecticide [34, 40, 48 -  
258 50, 53]. This result is in contrast to some *Aedes* populations observed in the Americas and Asia where  
259 high malathion resistance has been reported [17, 45, 57]. However, we highlight that our study (and  
260 most other studies performed in Africa) used a malathion concentration that was six times higher than  
261 what is typically recommended for *Aedes* by the WHO [51]. Our results suggest that carbamates and  
262 potentially malathion could be recommended insecticide options against *Ae. aegypti* in Kinshasa.

263  
264 To determine the underlying resistance mechanisms in *Ae. aegypti*, we also tested for *kdr* mutations.  
265 While the *kdr* mutations F1534C and V1016I were not detected in our study, V410L was detected at a

266 low frequency in the *Ae. aegypti* population from Lingwala. The F1534C mutation was previously  
267 reported in *Ae. aegypti* in West Africa [21, 49, 53, 58] but not in three studies conducted in central  
268 Africa [19, 40, 41]. The V1016I mutation in *Ae. aegypti* was also reported in Africa in Ghana, Burkina  
269 Faso, Cote d'Ivoire, Angola and Cape Verde [18, 19, 21, 49]. The V410L mutation was first detected  
270 in *Ae. aegypti* in Brazil [59]. Results from that study [59] revealed that this mutation alone could be  
271 responsible for a decrease in *Ae. aegypti* susceptibility to insecticides. Another study in Mexico  
272 reported this mutation in samples of *Ae. aegypti* collected in 2002 [39], well before the samples from  
273 the Brazilian study. The Mexican study revealed an increase in the frequency of this mutation reaching  
274 very high levels by 2016 [39]. In Africa, the V410L mutation was first reported in *Ae. aegypti* in  
275 Angola and Cape Verde [19]. This low mutation frequency was surprising given the usual tight  
276 linkage observed between the V1016I and V410L *kdr* loci, although occurrence of the 410L mutation  
277 alone has occasionally been observed [19, 39]. While mosquito surviving pyrethroid exposures were  
278 used for *kdr* genotyping in *Ae. aegypti* from Lingwala, mosquitoes of unknown resistance phenotype  
279 were used from Ngaliema. The V410L mutation may be contributing to *Aedes* insecticide resistance in  
280 Kinshasa, but given its low frequency, there are likely other resistance mechanisms that are also  
281 important. Future research can hopefully explore what those mechanisms are, as well as the  
282 frequencies of *kdr* mutations and other mechanisms to mutations that might cause resistance in *Ae.*  
283 *albopictus*.

284

285 This study had several limitations. First, the insecticide susceptibility tests were performed on  
286 mosquitoes from limited sampling areas. Moreover, higher doses of permethrin and malathion than  
287 recommended for *Aedes* were used in the bioassays, so resistance may be underestimated. Also, a  
288 limited number of mosquitoes were used to detect *kdr* mutations, so sampling a greater proportion of  
289 mosquitoes would give a more accurate estimate of allele frequencies. Despite these limitations, this  
290 study is valuable because for the first time, it reports data on the resistance patterns of *Aedes* in  
291 Kinshasa, including the detection of the *kdr* mutation V410L in *Ae. aegypti* in the DRC. This  
292 information will be useful to guide future insecticide resistance surveillance programmes and to  
293 develop control strategies for areas at high risk of *Aedes*-borne arboviruses in the DRC.

294 **Disclaimer**

295 The views expressed in this manuscript are those of the authors and do not necessarily reflect the  
296 official policy or position of the U.S. Centers for Disease Control and Prevention.

297

298 **Acknowledgments**

299 The authors would like to thank Vestergaard for the help to obtain insecticide impregnated paper.

300

301 **References**

- 302 1. Kraemer MU, Sinka ME, Duda KA, Mylne A, Shearer FM, Brady OJ, et al. The global  
303 compendium of *Aedes aegypti* and *Aedes albopictus* occurrence. *Sci Data*. 2015 Jul 7;2(1):1-  
304 8. <https://doi.org/10.1038/sdata.2015.35> PMID: [26175912](https://pubmed.ncbi.nlm.nih.gov/26175912/)
- 305 2. Powell JR, Gloria-Soria A, Kotsakiozi P. Recent history of *Aedes aegypti*: vector Genomics  
306 and Epidemiology records. *Bioscience*. 2018 Nov 1;68(11):854-60.  
307 <https://doi.org/10.1093/biosci/biy119> PMID: [30464351](https://pubmed.ncbi.nlm.nih.gov/30464351/)
- 308 3. Maynard AJ, Ambrose L, Cooper RD, Chow WK, Davis JB, Muzari MO, et al. Tigger on the  
309 prowl: Invasion history and spatio-temporal genetic structure of the Asian tiger mosquito  
310 *Aedes albopictus* (Skuse 1894) in the Indo-Pacific. *PLoS Negl Trop Dis*. 2017 Apr 14  
311 ;11(4):e0005546. <https://doi.org/10.1371/journal.pntd.0005546> PMID :[28410388](https://pubmed.ncbi.nlm.nih.gov/28410388/)
- 312 4. Paupy C, Delatte H, Bagny L, Corbel V, Fontenille D. *Aedes albopictus*, an arbovirus vector:  
313 from the darkness to the light. *Microb infect*. 2009 Dec 1;11(14-15):1177-85.  
314 <https://doi.org/10.1016/j.micinf.2009.05.005> PMID: [19450706](https://pubmed.ncbi.nlm.nih.gov/19450706/)
- 315 5. Kraemer MU, Sinka ME, Duda KA, Mylne AQ, Shearer FM, Barker CM, et al. The global  
316 distribution of the arbovirus vectors *Aedes aegypti* and *Ae. albopictus*. *Elife*. 2015 Jun  
317 30;4:e08347.. <https://doi.org/10.7554/eLife.08347> PMID: [26126267](https://pubmed.ncbi.nlm.nih.gov/26126267/)
- 318 6. Gubler DJ. The changing epidemiology of yellow fever and dengue, 1900 to 2003: full circle?  
319 *Comp Immunol Microbiol Infect Dis*. 2004 Sep 1;27(5):319-30.  
320 <https://doi.org/10.1016/j.cimid.2004.03.013> PMID: [15225982](https://pubmed.ncbi.nlm.nih.gov/15225982/)

- 321 7. Murray NE, Quam MB, Wilder-Smith A. Epidemiology of dengue: past, present and future  
322 prospects. *Clin Epidemiol.* 2013; 5:299. <https://doi.org/10.2147/CLEP.S34440>  
323 PMID: [23990732](https://pubmed.ncbi.nlm.nih.gov/23990732/)
- 324 8. Bhatt S, Gething PW, Brady OJ, Messina JP, Farlow AW, Moyes CL, et al. The global  
325 distribution and burden of dengue. *Nature.* 2013;496(7446):504–7.  
326 <https://doi.org/10.1038/nature12060> PMID: [23563266](https://pubmed.ncbi.nlm.nih.gov/23563266/)
- 327 9. Zeller H, Van Bortel W, Sudre B. Chikungunya: its history in Africa and Asia and its spread  
328 to new regions in 2013–2014. *J Infect Dis.* 2016 Dec 15;214(suppl\_5): S436-40.  
329 <https://doi.org/10.1093/infdis/jiw391> PMID: [27920169](https://pubmed.ncbi.nlm.nih.gov/27920169/)
- 330 10. Simpson DI. Zika virus infection in man. *Trans R Soc Trop.* 1964 ;58(4):335-8.  
331 PMID: [14175744](https://pubmed.ncbi.nlm.nih.gov/14175744/)
- 332 11. Dos Santos T, Rodriguez A, Almiron M, Sanhueza A, Ramon P, de Oliveira WK, et al. Zika  
333 virus and the Guillain–Barré syndrome—case series from seven countries. *N Engl J Med.*  
334 2016 Oct 20;375(16):1598-601. <https://doi.org/10.1056/NEJMc1609015> PMID: [27579558](https://pubmed.ncbi.nlm.nih.gov/27579558/)
- 335 12. Wilson AL, Courtenay O, Kelly-Hope LA, Scott TW, Takken W, Torr SJ, Lindsay SW. The  
336 importance of vector control for the control and elimination of vector-borne diseases. *PLoS*  
337 *Negl Trop Dis.* 2020 Jan 16;14(1):e0007831. <https://doi.org/10.1371/journal.pntd.0007831>.  
338 PMID: [31945061](https://pubmed.ncbi.nlm.nih.gov/31945061/).
- 339 13. Ahmed QA, Memish ZA. Yellow fever from Angola and Congo: a storm gathers. *Trop Doct.*  
340 2017;47(2):92-96. <https://doi.org/10.1177/0049475517699726> PMID: [28424031](https://pubmed.ncbi.nlm.nih.gov/28424031/)
- 341 14. World Health Organization. Bulletin of the World Health Organization. Past issues. volume  
342 94, number 8, August 2016, 557-632. <http://dx.doi.org/10.2471/BLT.16.000816>
- 343 15. World Health Organization, Special Program for Research, Training in Tropical Diseases,  
344 World Health Organization. Department of Control of Neglected Tropical Diseases, World  
345 Health Organization. Epidemic, Pandemic Alert. Dengue: guidelines for diagnosis, treatment,  
346 prevention and control. World Health Organization; 2009.  
347 <https://apps.who.int/iris/handle/10665/44188>

- 348 16. World Health Organization. 2001.report of the fourth WHOPES working group meeting:  
349 WHO/headquarters Geneva, Review of IR3535, KBC3023 (RS)-methoprene 20%EC,  
350 pyriproxyfen 0,5% gr and lambda-cyhalothrin 2,5% (Geneva). World health Organization  
351 Document. WHO/CDS/CPE/WHOPES/2001.2  
352 pdf. <https://apps.who.int/iris/handle/10665/66683>
- 353 17. Moyes CL, Vontas J, Martins AJ, Ng LC, Koou SY, Dusfour I, et al. Contemporary status of  
354 insecticide resistance in the major Aedes vectors of arboviruses infecting humans. PLoS Negl  
355 Trop Dis. 2017 Jul 20;11(7):e0005625. <https://doi.org/10.1371/journal.pntd.0005625>  
356 PMID: [28727779](https://pubmed.ncbi.nlm.nih.gov/28727779/)
- 357 18. Kawada H, Higa Y, Futami K, Muranami Y, Kawashima E, Osei JH, Sakyi KY, Dadzie S, de  
358 Souza DK, Appawu M. Discovery of point mutations in the voltage-gated sodium channel  
359 from African Aedes aegypti populations: potential phylogenetic reasons for gene  
360 introgression. PLoS Negl Trop Dis. 2016;10(6):e0004780.  
361 <https://doi.org/10.1371/journal.pntd.0004780> PMID: [27304430](https://pubmed.ncbi.nlm.nih.gov/27304430/)
- 362 19. Ayres CF, Seixas G, Borrego S, Marques C, Monteiro I, Marques CS, et al. The V410L  
363 knockdown resistance mutation occurs in island and continental populations of Aedes aegypti  
364 in West and Central Africa. PLOS Negl Trop Dis. 2020 May 8;14(5): e0008216.  
365 <https://doi.org/10.1371/journal.pntd.0008216> PMID: [32384079](https://pubmed.ncbi.nlm.nih.gov/32384079/)
- 366 20. Yougang AP, Kamgang B, Bahun TA, Tedjou AN, Nguiffo-Nguete D, Njiokou F, et al. First  
367 detection of F1534C knockdown resistance mutation in Aedes aegypti (Diptera: Culicidae)  
368 from Cameroon. Infect Dis Poverty. 2020 Dec;9(1):1-2. [https://doi.org/10.1186/s40249-020-](https://doi.org/10.1186/s40249-020-00769-1)  
369 [00769-1](https://doi.org/10.1186/s40249-020-00769-1) PMID: [33138860](https://pubmed.ncbi.nlm.nih.gov/33138860/)
- 370 21. Konan LY, Oumbouke WA, Silué UG, Coulibaly IZ, Ziogba JT, N'Guessan RK, et al.  
371 Insecticide Resistance Patterns and Mechanisms in Aedes aegypti (Diptera: Culicidae)  
372 Populations Across Abidjan, Côte d'Ivoire Reveal Emergent Pyrethroid Resistance. J Med  
373 Entomol. 2021 Apr 20: tjab045. <http://doi:10.1093/jme/tjab045> PMID: [33876233](https://pubmed.ncbi.nlm.nih.gov/33876233/)

- 374 22. Weetman D, Kamgang B, Badolo A, Moyes CL, Shearer FM, Coulibaly M, et al. Aedes  
375 mosquitoes and Aedes-borne arboviruses in Africa: current and future threats. *Int J Environ*  
376 *Res Public Health*. 2018 Feb;15(2):220. <https://doi.org/10.3390/ijerph15020220>  
377 PMID: [29382107](https://pubmed.ncbi.nlm.nih.gov/29382107/)
- 378 23. Rimoin AW, Hotez PJ. NTDs in the heart of darkness: The Democratic Republic of Congo's  
379 unknown burden of neglected tropical diseases. *PLoS Negl Trop Dis*. 2003; 49:587-599.  
380 <https://doi.org/10.1371/journal.pntd.0002118> PMID: [23936557](https://pubmed.ncbi.nlm.nih.gov/23936557/)
- 381 24. Selhorst P, Makiala-Mandanda S, De Smet B, Mariën J, Anthony C, Binene-Mbuka G, et al.  
382 Molecular characterization of chikungunya virus during the 2019 outbreak in the Democratic  
383 Republic of the Congo. *Emerg Microbes Infect*. 2020 Jan 1;9(1):1912-8.  
384 <https://doi.org/10.1080/22221751.2020.1810135> PMID: [32787529](https://pubmed.ncbi.nlm.nih.gov/32787529/)
- 385 25. De Weggheleire A, Nkuba-Ndaye A, Mbala-Kingebeni P, Mariën J, Kindombe-Luzolo E,  
386 Ilombe G, et al. A Multidisciplinary Investigation of the First Chikungunya Virus Outbreak in  
387 Matadi in the Democratic Republic of the Congo. *Viruses*. 2021 Oct;13(10):1988.  
388 <https://doi.org/10.3390/v13101988>
- 389 26. Muyembe-Tamfum JJ, Peyrefitte CN, Yogolelo R, Basisya EM, Koyange D, Pukuta E,  
390 Mashako M, et al. LETTRES-Epidemies a virus Chikungunya en 1999 et 2000 en Republique  
391 Democratique du Congo. *Med Trop*. 2003;63(6):637-38. PMID: [15077435](https://pubmed.ncbi.nlm.nih.gov/15077435/)
- 392 27. Ido E, Ahuka S, Karhemere S, Ibuki K, Shibata M, Kameoka M, et al. Dengue virus infection  
393 during an outbreak of chikungunya virus in Democratic Republic of Congo. *Ann Afr Med*.  
394 2016;10(1).
- 395 28. Otshudiema JO, Ndakala NG, Mawanda E-TK, Tshapenda GP, Kimfuta JM, Nsibu L-RN, et  
396 al. Yellow Fever Outbreak—Kongo Central Province, Democratic Republic of the Congo,  
397 August 2016. *MMWR Morb Mortal Wkly Rep*. 2017 Mar 31;66(12):335–8.  
398 <https://doi.org/10.15585/mmwr.mm6612a5> PMID: [28358796](https://pubmed.ncbi.nlm.nih.gov/28358796/)
- 399 29. Proesmans S, Katshongo F, Milambu J, Fungula B, Mavoko HM, Ahuka-Mundeke S, et al.  
400 Dengue and Chikungunya among Febrile Outpatients in Kinshasa, Democratic Republic of



- 401 Congo: a cross-sectional study. *Plos Negl Trop Dis*. 2019 Sept 5:e0007047.  
402 <https://doi.org/10.1371/journal.pntd.0007047> PMID: [31487279](https://pubmed.ncbi.nlm.nih.gov/31487279/)
- 403 30. Makiala-Mandanda S, Ahuka-Mundeke S, Abbate JL, Pukuta-Simbu E, Nsio-Mbeta J, Berthet  
404 N, et al. Identification of Dengue and Chikungunya cases among suspected cases of Yellow  
405 Fever in the Democratic Republic of the Congo. *Vector Borne Zoonotic Dis*. 2018 Jul  
406 1;18(7):364-70. <https://doi.org/10.1089/vbz.2017.2176> PMID: [29768102](https://pubmed.ncbi.nlm.nih.gov/29768102/)
- 407 31. Malekani MJ, Mccollum AM, Monroe B, Malekani V, Mulumba M, Nguete B, et al. Cas de  
408 dengue chez les patients suspects de chikungunya à Kinshasa. *Ann Afr Med*. 2014;7:2.
- 409 32. Bobanga T, Moyo M, Vulu F, Irish SR. First report of *Aedes albopictus* (Diptera: Culicidae)  
410 in the Democratic Republic of Congo. *Afr Entomol*. 2018 Mar 1;26(1):234-6.  
411 <https://doi.org/10.4001/003.026.0234>
- 412 33. Mbanzulu KM, Wumba R, Mukendi JP, Zanga JK, Shija F, Bobanga TL, et al. Mosquito-  
413 borne viruses circulating in Kinshasa, Democratic Republic of the Congo. *Int J Infect Dis*.  
414 2017 Apr 1; 57:32-7. <https://doi.org/10.1016/j.ijid.2017.01.016> PMID: [28153792](https://pubmed.ncbi.nlm.nih.gov/28153792/)  
415 <https://doi.org/10.1080/22221751.2020.1810135> PMID: [32787529](https://pubmed.ncbi.nlm.nih.gov/32787529/)
- 416 34. Ingelbeen B, Weregemere NA, Noel H, Tshapenda GP, Mossoko M, Nsio J, et al. Urban  
417 yellow fever outbreak—Democratic Republic of the Congo, 2016: Towards more rapid case  
418 detection. *PLoS Negl Trop Dis*. 2018 Dec 7;12(12):e0007029.  
419 <https://doi.org/10.1371/journal.pntd.0007029> PMID: [30532188](https://pubmed.ncbi.nlm.nih.gov/30532188/)
- 420 35. Huang YM. The subgenus *Stegomyia* of *Aedes* in the Afrotropical Region with keys to the  
421 species (Diptera: Culicidae). *Zootaxa*. 2004 Oct 27;700(1):1-120.  
422 <https://doi.org/10.11646/zootaxa.700.1.1>
- 423 36. World Health Organization. Test procedures for insecticide resistance monitoring in malaria  
424 vector mosquitoes (2<sup>nd</sup> Edition). WHO Libr Cat Data. 2016.  
425 <https://www.who.int/malaria/publications/atoz/978241511575/en/>.
- 426 37. Yanola J, Somboon P, Walton C, Nachaiwieng W, Somwang P, Prapanthadara LA. High-  
427 throughput assays for detection of the F1534C mutation in the voltage-gated sodium channel  
428 gene in permethrin-resistant *Aedes aegypti* and the distribution of this mutation throughout

- 429 Thailand. *Trop Med Int Health*. 2011;16(4):501–9. <https://doi.org/10.1111/j.1365->  
430 [3156.2011.02725.x](https://doi.org/10.1111/j.1365-2583.2011.02725.x) PMID: [21342372](https://pubmed.ncbi.nlm.nih.gov/21342372/)
- 431 38. Saavedra-Rodriguez K, Urdaneta-Marquez L, Rajatileka S, Moulton M, Flores AE,  
432 Fernandez-Salas I, et al. A mutation in the voltage-gated sodium channel gene associated with  
433 pyrethroid resistance in Latin American *Aedes aegypti*. *Insect Mol Biol*. 2007;16(6):785–98.  
434 <https://doi.org/10.1111/j.1365-2583.2007.00774.x> PMID: [18093007](https://pubmed.ncbi.nlm.nih.gov/18093007/)
- 435 39. Saavedra-Rodriguez K, Maloof FV, Campbell CL, Garcia-Rejon J, Lenhart A, Penilla P, et al.  
436 Parallel evolution of *vgsc* mutations at domains IS6, IIS6 and IIIS6 in pyrethroid resistant  
437 *Aedes aegypti* from Mexico. *Sci Rep*. 2018 Apr 30;8(1):1-9. <https://doi.org/10.1038/s41598->  
438 [018-25222-0](https://doi.org/10.1038/s41598-018-25222-0) PMID: [29712956](https://pubmed.ncbi.nlm.nih.gov/29712956/)
- 439 40. Ngoagouni C, Kamgang B, Brengues C, Yahouedo G, Paupy C, Nakouné E, et al.  
440 Susceptibility profile and metabolic mechanisms involved in *Aedes aegypti* and *Aedes*  
441 *albopictus* resistant to DDT and deltamethrin in the Central African Republic. *Parasit Vectors*.  
442 2016 Dec;9(1):1-3. <https://doi.org/10.1186/s13071-016-1887-5> PMCID: [PMC5121976](https://pubmed.ncbi.nlm.nih.gov/PMC5121976/)
- 443 41. Kamgang B, Wilson-Bahun TA, Yougang AP, Lenga A, Wondji CS. Contrasting resistance  
444 patterns to type I and II pyrethroids in two major arbovirus vectors *Aedes aegypti* and *Aedes*  
445 *albopictus* in the Republic of the Congo, Central Africa. *Infect Dis Poverty*. 2020 Dec;9(1):1-  
446 0. <https://doi.org/10.1186/s40249-020-0637-2> PMID: [32114983](https://pubmed.ncbi.nlm.nih.gov/32114983/)
- 447 42. Yougang AP, Kamgang B, Tedjou AN, Wilson-Bahun TA, Njiokou F, Wondji CS.  
448 Nationwide profiling of insecticide resistance in *Aedes albopictus* (Diptera: Culicidae) in  
449 Cameroon. *Plos One*. 2020 Jun 18;15(6):e0234572.  
450 <https://doi.org/10.1371/journal.pone.0234572> PMID: [32555588](https://pubmed.ncbi.nlm.nih.gov/32555588/)
- 451 43. Namountougou M, Soma DD, Balboné M, Kaboré DA, Kientega M, Hien A, et al. Monitoring  
452 Insecticide Susceptibility in *Aedes aegypti* Populations from the Two Biggest Cities,  
453 Ouagadougou and Bobo-Dioulasso, in Burkina Faso: Implication of Metabolic Resistance.  
454 *Trop Med Infect Dis*. 2020 Jun;5(2):84. <https://doi.org/10.3390/tropicalmed5020084>  
455 PMID: [32471266](https://pubmed.ncbi.nlm.nih.gov/32471266/)

- 456 44. Guedes RN, Beins K, Navarro Costa D, Coelho gGE, Bezerra HS. Patterns of insecticide  
457 resistance in *Aedes aegypti*: meta-analyses of surveys in Latin America and the Caribbean.  
458 *Pest Manag Sci.* 2020 Jun;76(6):2144-57. <https://doi.org/10.1002/ps.5752> PMID: [31957156](https://pubmed.ncbi.nlm.nih.gov/31957156/)
- 459 45. Marcombe S, Fustec B, Cattel J, Chonephetsarath S, Thammavong P, Phommavanh N, et al.  
460 Distribution of insecticide resistance and mechanisms involved in the arbovirus vector *Aedes*  
461 *aegypti* in Laos and implication for vector control. *PLoS Negl Trop Dis.* 2019 Dec  
462 12;13(12):e0007852. <https://doi.org/10.1371/journal.pntd.0007852> PMID: [31830027](https://pubmed.ncbi.nlm.nih.gov/31830027/)
- 463 46. Duong TT, Dung NV, Chinh VD, Trung HD. Mapping insecticide resistance in dengue  
464 vectors in the northern Viet Nam, 2010-2013. *Vector Biol J.* 2016;1(1):1-6.  
465 [https://doi.org:10.4172/2473-4810.1000105](https://doi.org/10.4172/2473-4810.1000105)
- 466 47. Nuapia Y, Chimuka L, Cukrowska E. Assessment of organochlorine pesticide residues in raw  
467 food samplges from open markets in two African cities. *Chemosphere.* 2016 Dec;164:480-  
468 487. <https://doi:10.1016/j.chemosphere.2016.08.055>. Epub 2016 Sep 8. PMID: [27614040](https://pubmed.ncbi.nlm.nih.gov/27614040/)
- 469 48. Ayorinde A, Oboh B, Oduola A, Otubanjo O. The insecticide susceptibility status of *Aedes*  
470 *aegypti* (Diptera: Culicidae) in farm and nonfarm sites of Lagos State, Nigeria. *J Insect Sci.*  
471 2015 Jun 22;15(1):75. <https://doi.org/10.1093/jisesa/iev045> PMID: [26106087](https://pubmed.ncbi.nlm.nih.gov/26106087/)
- 472 49. Sombié A, Saiki E, Yaméogo F, Sakurai T, Shirozu T, Fukumoto S, Sanon A, Weetman D,  
473 McCall PJ, Kanuka H, Badolo A. High frequencies of F1534C and V1016I kdr mutations and  
474 association with pyrethroid resistance in *Aedes aegypti* from Somgandé (Ouagadougou),  
475 Burkina Faso. *Trop Med and Health.* 2019 Dec 1;47(1):2. [https://doi.org/10.1186/s41182-018-](https://doi.org/10.1186/s41182-018-0134-5)  
476 [0134-5](https://doi.org/10.1186/s41182-018-0134-5) PMID: [30787670](https://pubmed.ncbi.nlm.nih.gov/30787670/)
- 477 50. Namountougou M, Soma DD, Kaboré DA, N'do S, Kientega M, Sawadogo JE, et al.  
478 Characterisation of the breeding sites and insecticide resistance of *Aedes aegypti* population in  
479 the city of Bobo-Dioulasso, Burkina Faso. *Afric Entomol.* 2020 Jun;28(1):142-9.  
480 <https://doi.org/10.4001/003.028.0142>
- 481 51. World Health Organization. Monitoring and managing insecticide resistance in *Aedes*  
482 mosquito populations: interim guidance for entomologists.  
483 2016. <https://apps.who.int/iris/handle/10665/204588>

- 484 52. Owusu-Asenso CM. Spatio-Temporal Distribution and Insecticide Resistance Status of  
485 Aedes Mosquitoes in Ghana. Doctoral dissertation, University of Ghana. 2018.  
486 <http://ugspace.ug.edu.gh/handle/123456789/25985>
- 487 53. Badolo A, Sombié A, Pignatelli PM, Sanon A, Yaméogo F, Wangrawa DW, et al. Insecticide  
488 resistance levels and mechanisms in *Aedes aegypti* populations in and around Ouagadougou,  
489 Burkina Faso. *PLoS Negl Trop Dis*. 2019 May 23;13(5):e0007439.  
490 <https://doi.org/10.1371/journal.pntd.0007439> PMID: [31120874](https://pubmed.ncbi.nlm.nih.gov/31120874/)
- 491 54. Mathias L, Baraka V, Philbert A, Innocent E, Francis F, Nkwengulila G, Kweka EJ. Habitat  
492 productivity and pyrethroid susceptibility status of *Aedes aegypti* mosquitoes in Dar es  
493 Salaam, Tanzania. *Infect Dis Poverty*. 2017 Dec 1;6(1):102. [https://doi.org/10.1186/s40249-](https://doi.org/10.1186/s40249-017-0316-0)  
494 [017-0316-0](https://doi.org/10.1186/s40249-017-0316-0) PMID: [28595653](https://pubmed.ncbi.nlm.nih.gov/28595653/)
- 495 55. Bayebila T, Dufour P, Pirard C, Nsangu J, Mufusama JP, Mbinze J, Marini R, Charlier C. Bio-  
496 surveillance of environmental pollutants in the population of Kinshasa, Democratic Republic  
497 of Congo (DRC): A small pilot study. *Res Sq*; 2021. [https://doi.org/10.21203/rs.3.rs-](https://doi.org/10.21203/rs.3.rs-314598/v1)  
498 [314598/v1](https://doi.org/10.21203/rs.3.rs-314598/v1)
- 499 56. Kahamba NF, Limwagu AJ, Mapua SA, Msugupakulya BJ, Msaky DS, Kaindoa EW, et al.  
500 Habitat characteristics and insecticide susceptibility of *Aedes aegypti* in the Ifakara area,  
501 south-eastern Tanzania. *Parasit Vectors*. 2020 Dec 1;13(1):53. [https://doi.org/10.1186/s13071-](https://doi.org/10.1186/s13071-020-3920-y)  
502 [020-3920-y](https://doi.org/10.1186/s13071-020-3920-y) PMID: [32033619](https://pubmed.ncbi.nlm.nih.gov/32033619/)
- 503 57. Francis S, Campbell T, McKenzie S, Wright D, Crawford J, Hamilton T, et al. Screening of  
504 insecticide resistance in *Aedes aegypti* populations collected from parishes in Eastern Jamaica.  
505 *PLoS Negl Trop Dis*. 2020 Jul 27;14(7):e0008490.  
506 <https://doi.org/10.1371/journal.pntd.0008490> PMID : [32716942](https://pubmed.ncbi.nlm.nih.gov/32716942/)
- 507 58. Kudom AA. Entomological surveillance to assess potential outbreak of Aedes-borne  
508 arboviruses and insecticide resistance status of *Aedes aegypti* from Cape Coast, Ghana. *Acta*  
509 *tropica*. 2020 Feb 1; 202:105257. <https://doi.org/10.1016/j.actatropica.2019.105257>  
510 PMID: [31682813](https://pubmed.ncbi.nlm.nih.gov/31682813/)

511 59. Haddi K, Tomé HV, Du Y, Valbon WR, Nomura Y, Martins GF, et al. Detection of a new  
512 pyrethroid resistance mutation (V410L) in the sodium channel of *Aedes aegypti*: a potential  
513 challenge for mosquito control. *Sci Rep.* 2017 Apr 19;7(1):1-9.  
514 <https://doi.org/10.1038/srep46549> PMID: [28422157](https://pubmed.ncbi.nlm.nih.gov/28422157/)  
515

516 **Supporting file captions**

517 **S1 Appendix. Frequency of *kdr* mutations in *Ae. aegypti*.**

518

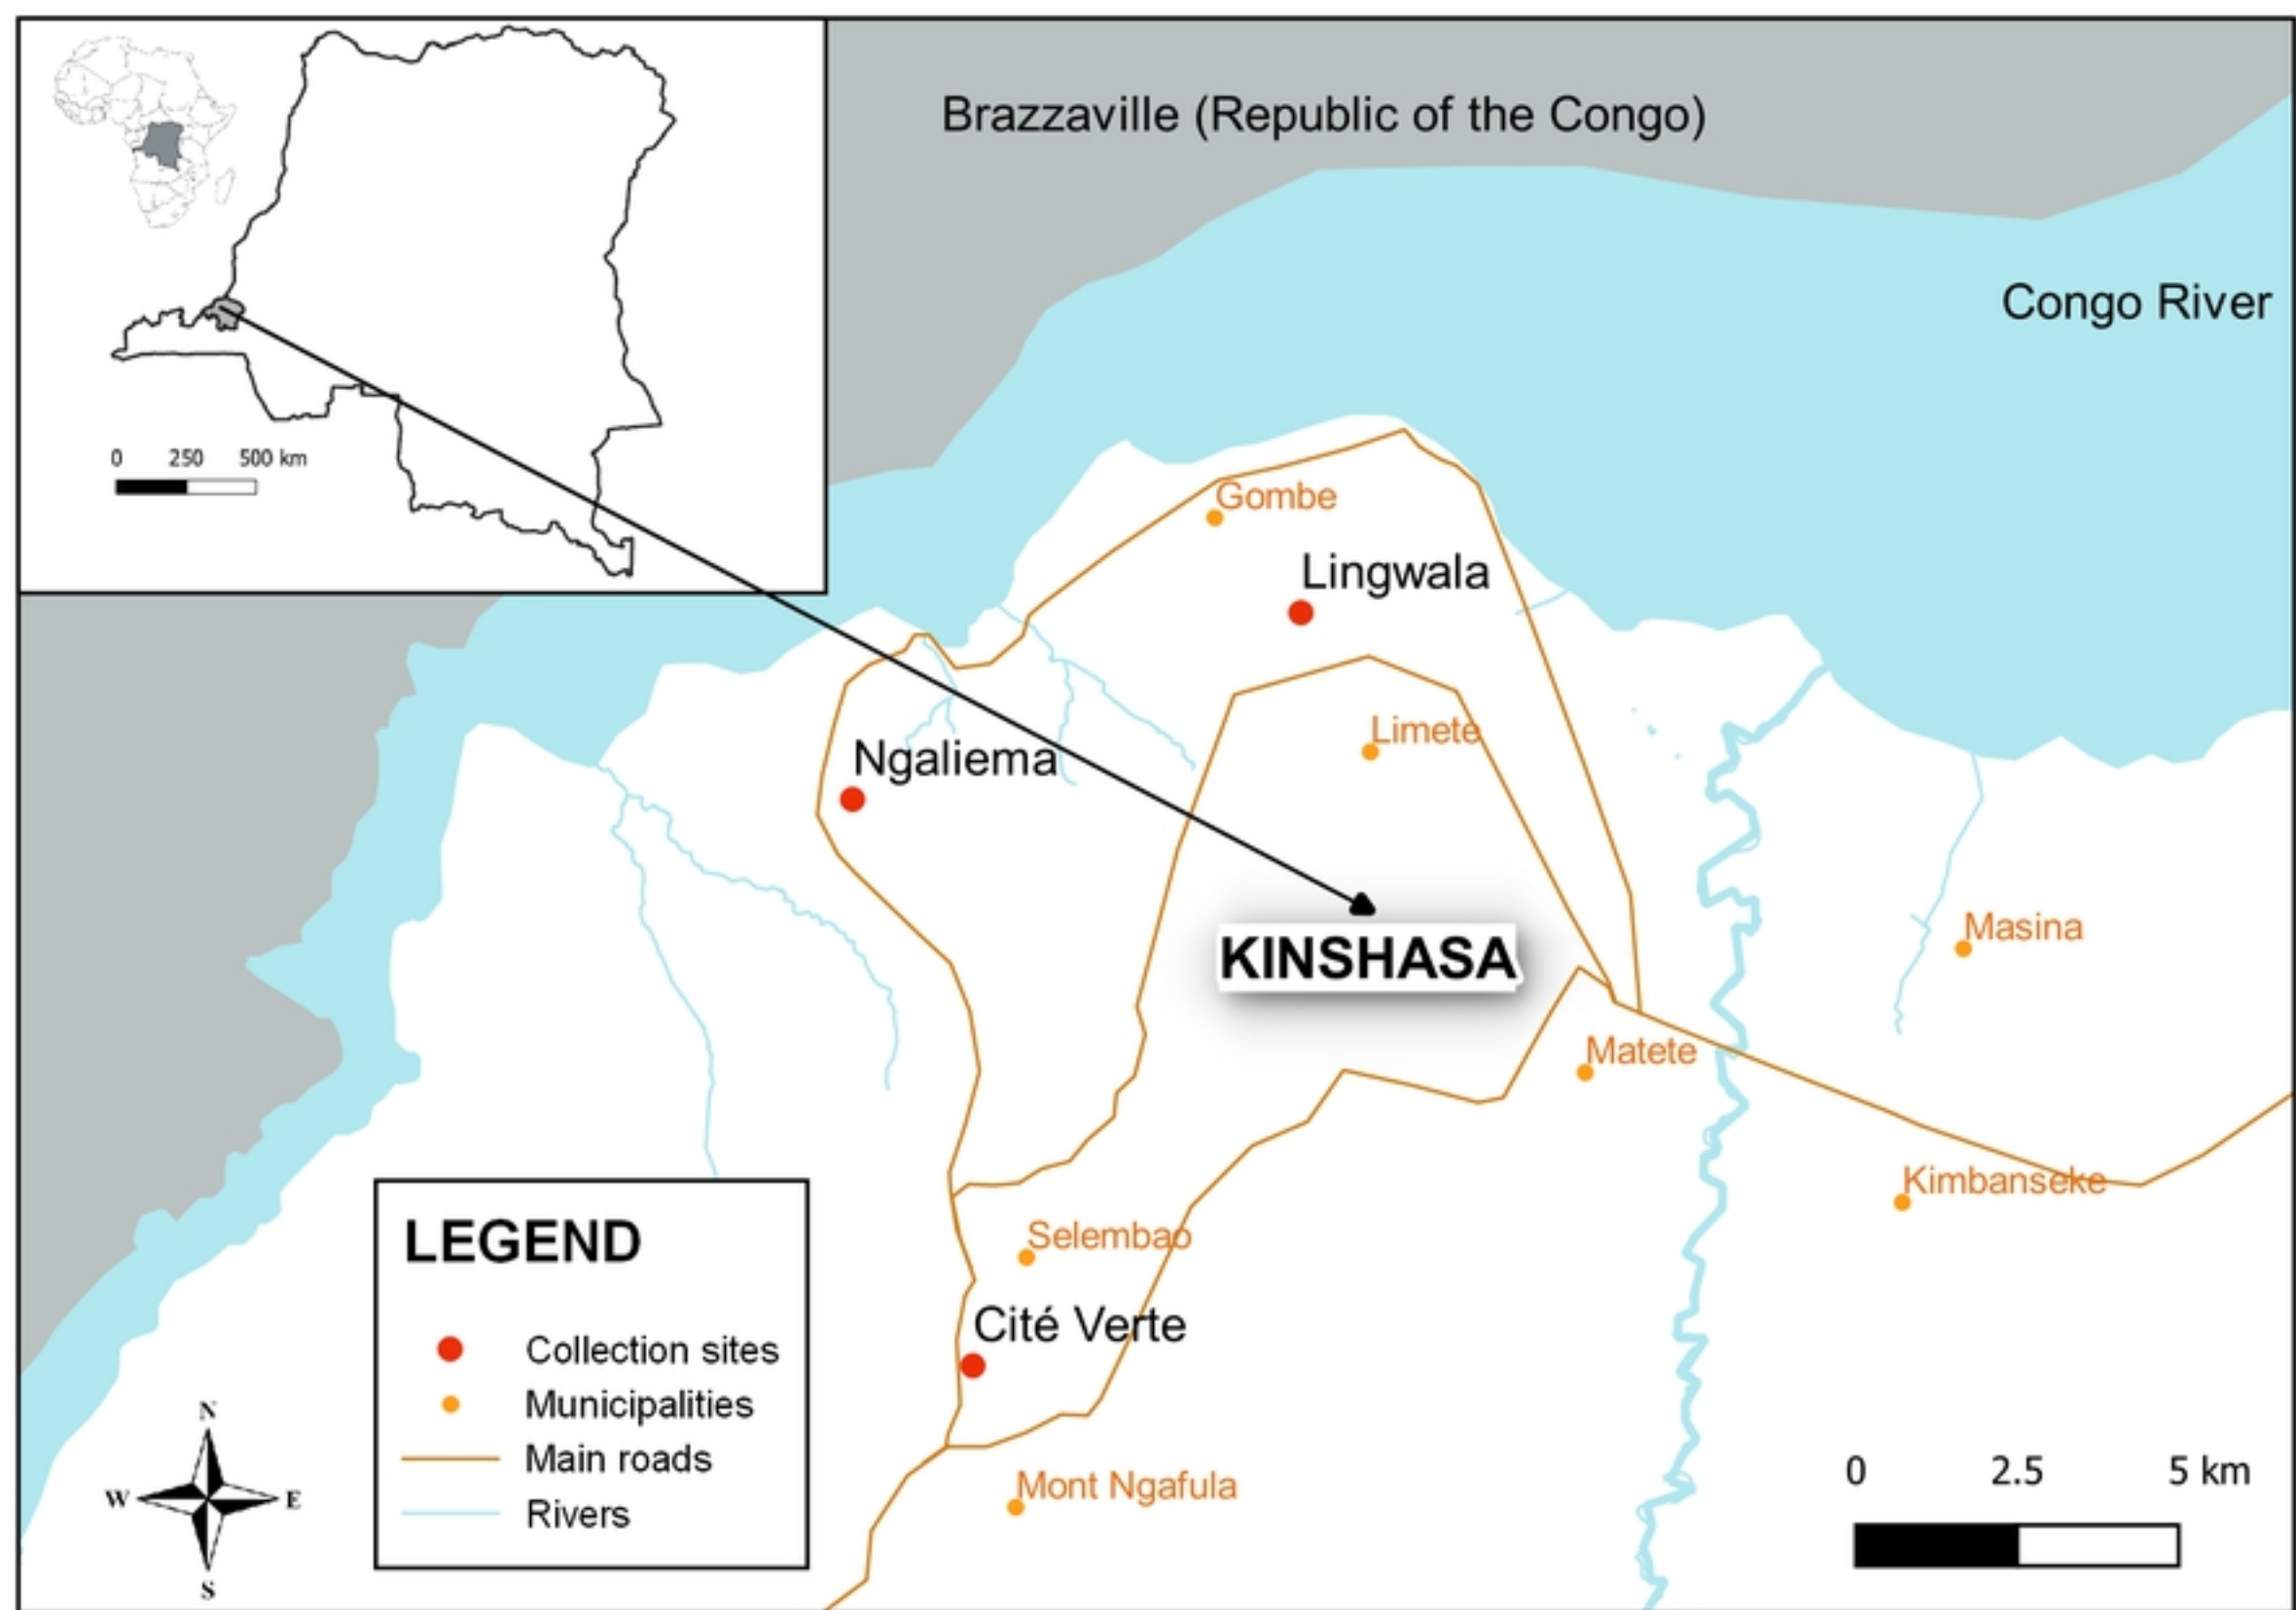

Figure
